# Supplementary material
Source: MDPI journal article supplement (https://www.mdpi.com/1999-4907/13/2/202)
Supplement: s1 [file s1]

## Supplementary materials for

# Forest structure and composition are critical to hurricane-induced mortality

Jiaying Zhang <sup>1,\*</sup>, Tamara Heartsill-Scalley <sup>2</sup> and Rafael L. Bras <sup>1</sup>

<sup>1</sup>School of Civil and Environmental Engineering, Georgia Institute of Technology, Atlanta, 30332, Georgia, USA

<sup>2</sup>International Institute of Tropical Forestry, USDA Forest Service, Rio Piedras, 00926, Puerto Rico, USA

\*jiaying.zhang@gatech.edu

This PDF file includes:

Figures S1 to S4

Tables S1 to S5

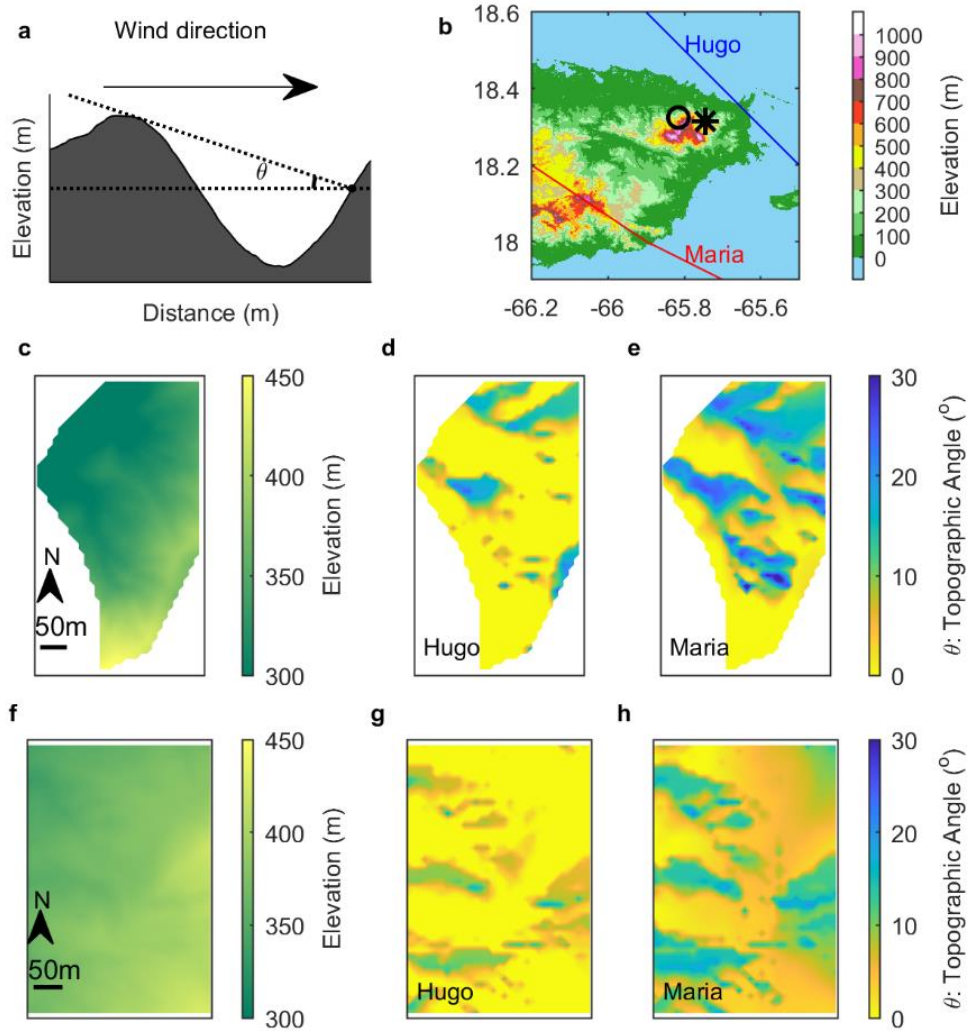

**Figure S1.** Topographic angle maps of two study sites from two hurricanes. Method of calculating topographic angle ( $\theta$ ) of a given point (a), location of the Bisley Experimental Watersheds (BEW) (black star) and the Luquillo Forest Dynamics Plot (LFDP) (black circle) relative to the tracks of hurricanes Hugo and María (colored lines) (b), elevation map of the BEW (c) and the map of the topographic angle of BEW regarding hurricane Hugo (d) and hurricane María (e). (f–h) are the same as (c–e), except for the LFDP. The topographic angle reveals the likelihood of exposure of a given point to wind disturbances, and smaller angle indicates higher likelihood of being exposed to the wind. The maps in (d,e,g,h) show the minimum topographical angle (maximum exposure) of the pixel among the times when the hurricanes were within 500 km of the site.

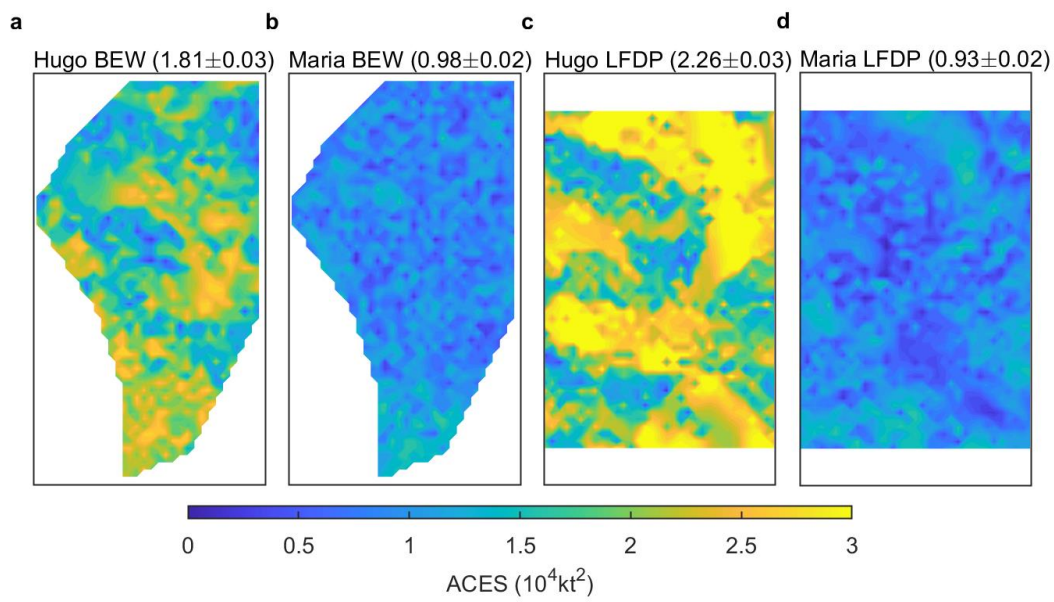

**Figure S2.** Same as Figure S1d, e, g, h, but for the accumulated cyclone energy at site (ACES). The domain mean and 95% confidence interval for each site during each hurricane are given in parentheses.

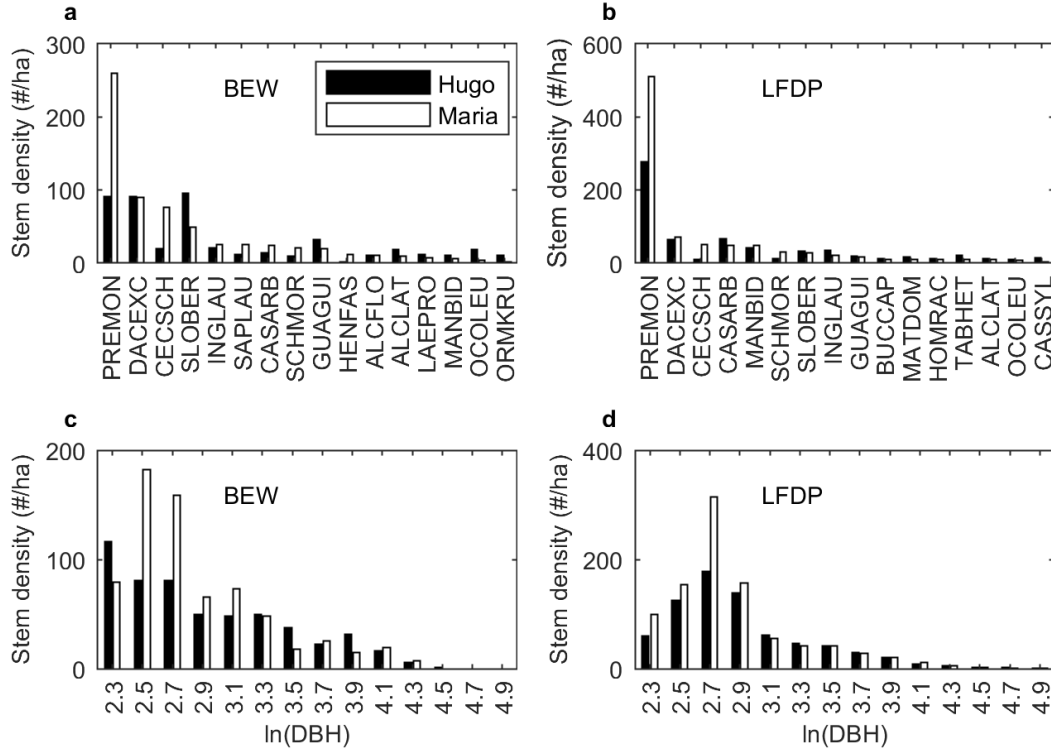

**Figure S3.** Species composition and size structure of the two sites (BEW and LFDP) during the two hurricane events (María and Hugo). (a) and (c) show the stem density of each species (a) and each DBH size (c) with DBH  $\geq 10$  cm and density  $\geq 10$  #/ha at BEW at the times of hurricane Hugo and hurricane María. (b,d) are the same as (a,c), but for LFDP. The DBH in x-axis in (c,d) are on a logarithmic scale. The data for LFDP in (b,d) are from Table S1 and Figure S1, respectively, in Uriarte et al. [4], which is under creative commons license (<https://creativecommons.org/licenses/by/4.0/>, last accessed 25 January 2022). The two distributions in each panel are significantly different ( $P < 0.0001$ ) using  $\chi^2$  test.



**Table S1.** Code, Genus and species, Family, and Plant Function Type (PFT) of each species, listed in the order of descending abundance for each PFT before hurricane María. The scientific name of species follows the Integrated Taxonomic Information System (<https://www.itis.gov/>, last accessed 25 January 2022).

| Code   | Genus and species               | Family          | PFT   |
|--------|---------------------------------|-----------------|-------|
| PREMON | <i>Prestoea montana</i>         | Arecaceae       | Palm  |
| CECSCH | <i>Cecropia schreberiana</i>    | Moraceae        | Early |
| SCHMOR | <i>Schefflera morototoni</i>    | Araliaceae      | Early |
| MICTET | <i>Miconia tetrandra</i>        | Melastomataceae | Early |
| PSYBER | <i>Psychotria berteriana</i>    | Rubiaceae       | Early |
| MICPRA | <i>Miconia prasina</i>          | Melastomataceae | Early |
| PSYBRA | <i>Psychotria brachiata</i>     | Rubiaceae       | Early |
| DENARB | <i>Dendropanax arboreus</i>     | Araliaceae      | Early |
| CLIHIR | <i>Clidemia hirta</i>           | Melastomataceae | Early |
| MICRAC | <i>Miconia racemosa</i>         | Melastomataceae | Early |
| PALCRO | <i>Palicourea croceoides</i>    | Rubiaceae       | Early |
| UREBAC | <i>Urera baccifera</i>          | Urticaceae      | Early |
| CASARB | <i>Casearia arborea</i>         | Flacourtiaceae  | Mid   |
| INGLAU | <i>Inga laurina</i>             | Fabaceae        | Mid   |
| OCOLEU | <i>Ocotea leucoxylon</i>        | Lauraceae       | Mid   |
| SAPLAU | <i>Sapium laurocerasus</i>      | Euphorbiaceae   | Mid   |
| CORBOR | <i>Cordia borinquensis</i>      | Boraginaceae    | Mid   |
| HENFAS | <i>Henriettea fascicularis</i>  | Melastomataceae | Mid   |
| ALCFLO | <i>Alchorneopsis floribunda</i> | Euphorbiaceae   | Mid   |
| ALCLAT | <i>Alchornea latifolia</i>      | Euphorbiaceae   | Mid   |
| LAEPRO | <i>Laetia procera</i>           | Flacourtiaceae  | Mid   |
| MYRDEF | <i>Myrcia deflexa</i>           | Myrtaceae       | Mid   |
| ANIBRA | <i>Aniba bracteata</i>          | Lauraceae       | Mid   |
| STEOBT | <i>Stenostomum obtusifolium</i> | Rubiaceae       | Mid   |
| ANDINE | <i>Andira inermis</i>           | Fabaceae        | Mid   |
| INGVER | <i>Inga vera</i>                | Fabaceae        | Mid   |
| MYRSPL | <i>Myrcia splendens</i>         | Myrtaceae       | Mid   |
| SYZJAM | <i>Syzygium jambos</i>          | Myrtaceae       | Mid   |
| MELHER | <i>Meliosma herbertii</i>       | Sabiaceae       | Mid   |
| QUATUR | <i>Quararibea turbinata</i>     | Bombacaceae     | Mid   |
| DRYGLA | <i>Drypetes glauca</i>          | Euphorbiaceae   | Mid   |
| ORMKRU | <i>Ormosia krugii</i>           | Fabaceae        | Mid   |
| CORSUL | <i>Cordia sulcata</i>           | Boraginaceae    | Mid   |
| HOMRAC | <i>Homalium racemosum</i>       | Flacourtiaceae  | Mid   |
| BYRSPI | <i>Byrsonima spicata</i>        | Malpighiaceae   | Mid   |
| TABHET | <i>Tabebuia heterophylla</i>    | Bignoniaceae    | Mid   |

|        |                                 |                  |      |
|--------|---------------------------------|------------------|------|
| OCOSPA | <i>Ocotea spathulata</i>        | Lauraceae        | Mid  |
| HENSQU | <i>Henriettea squamulosum</i>   | Melastomataceae  | Mid  |
| SLOBER | <i>Sloanea berteriana</i>       | Elaeocarpaceae   | Late |
| DACEXC | <i>Dacryodes excelsa</i>        | Burseraceae      | Late |
| CYAPOR | <i>Cyathea portoricensis</i>    | Cyatheaceae      | Late |
| GUAGUI | <i>Guarea guidonia</i>          | Meliaceae        | Late |
| MANBID | <i>Manilkara bidentata</i>      | Sapotaceae       | Late |
| CYAARB | <i>Cyathea arborea</i>          | Cyatheaceae      | Late |
| GUAGLA | <i>Guarea glabra</i>            | Meliaceae        | Late |
| EUGEGE | <i>Eugenia eggersii</i>         | Myrtaceae        | Late |
| BUCCAP | <i>Buchenavia tetrphylla</i>    | Combretaceae     | Late |
| SWIMAC | <i>Swietenia macrophylla</i>    | Meliaceae        | Late |
| TETBAL | <i>Tetragastris balsamifera</i> | Burseraceae      | Late |
| HIRRUG | <i>Hirtella rugosa</i>          | Chrysobalanaceae | Late |
| EUGSTA | <i>Eugenia stahlui</i>          | Myrtaceae        | Late |
| ILEOBC | <i>Ilex obcordata</i>           | Aquifoliaceae    | Late |
| MAGSPL | <i>Magnolia splendens</i>       | Magnoliaceae     | Late |
| KHANYA | <i>Khaya anthotheca</i>         | Meliaceae        | Late |
| TRIPAL | <i>Trichilia pallida</i>        | Meliaceae        | Late |
| CASGUI | <i>Cassipourea guianensis</i>   | Rhizophoraceae   | Late |
| LAPPOR | <i>Laplacea portoricensis</i>   | Theaceae         | Late |

**Table S2.** Mortality of each species from hurricanes Hugo and María. The list is in the descending order of the abundance of each species before hurricane María.

| Species Code | # of stems before Hugo | # of stems dead after Hugo | Mortality from Hugo | # of stems before María | # of stems dead after María | Mortality from María |
|--------------|------------------------|----------------------------|---------------------|-------------------------|-----------------------------|----------------------|
| PREMON       | 65                     | 27                         | 41.5%               | 184                     | 23                          | 12.5%                |
| SLOBER       | 260                    | 164                        | 63.1%               | 159                     | 7                           | 4.4%                 |
| DACEXC       | 109                    | 36                         | 33.0%               | 102                     | 3                           | 2.9%                 |
| CYAPOR       | 39                     | 28                         | 71.8%               | 57                      | 3                           | 5.3%                 |
| CECSCH       | 17                     | 8                          | 47.1%               | 54                      | 28                          | 51.9%                |
| CASARB       | 31                     | 11                         | 35.5%               | 31                      | 6                           | 19.4%                |
| INGLAU       | 41                     | 21                         | 51.2%               | 29                      | 1                           | 3.5%                 |
| OCOLEU       | 52                     | 42                         | 80.8%               | 28                      | 3                           | 10.7%                |
| SAPLAU       | 8                      | 6                          | 75.0%               | 23                      | 1                           | 4.4%                 |
| SCHMOR       | 8                      | 7                          | 87.5%               | 18                      | 1                           | 5.6%                 |
| CORBOR       | 17                     | 5                          | 29.4%               | 17                      | 0                           | 0.0%                 |
| GUAGUI       | 26                     | 7                          | 26.9%               | 15                      | 0                           | 0.0%                 |
| HENFAS       | 4                      | 0                          | 0.0%                | 15                      | 3                           | 20.0%                |
| PSYBER       | 48                     | 45                         | 93.8%               | 13                      | 2                           | 15.4%                |
| MICTET       | 8                      | 5                          | 62.5%               | 13                      | 4                           | 30.8%                |
| MANBID       | 14                     | 6                          | 42.9%               | 10                      | 0                           | 0.0%                 |
| ALCFLO       | 9                      | 4                          | 44.4%               | 8                       | 0                           | 0.0%                 |
| ALCLAT       | 14                     | 9                          | 64.3%               | 7                       | 0                           | 0.0%                 |
| LAEPRO       | 8                      | 2                          | 25.0%               | 7                       | 0                           | 0.0%                 |
| MYRDEF       | 8                      | 8                          | 100.0%              | 7                       | 0                           | 0.0%                 |
| ANIBRA       | 3                      | 2                          | 66.7%               | 6                       | 1                           | 16.7%                |
| STEOBT       | 2                      | 0                          | 0.0%                | 6                       | 0                           | 0.0%                 |
| CYAARB       | 1                      | 1                          | 100.0%              | 6                       | 2                           | 33.3%                |
| GUAGLA       | 25                     | 16                         | 64.0%               | 5                       | 0                           | 0.0%                 |
| ANDINE       | 3                      | 1                          | 33.3%               | 5                       | 0                           | 0.0%                 |
| MELHER       | 17                     | 12                         | 70.6%               | 4                       | 0                           | 0.0%                 |
| INGVER       | 7                      | 5                          | 71.4%               | 4                       | 1                           | 25.0%                |
| EUGEGE       | 5                      | 2                          | 40.0%               | 4                       | 0                           | 0.0%                 |
| MYRSPL       | 3                      | 0                          | 0.0%                | 4                       | 0                           | 0.0%                 |
| MICPRA       | 2                      | 1                          | 50.0%               | 4                       | 0                           | 0.0%                 |
| SYZJAM       | 2                      | 1                          | 50.0%               | 4                       | 0                           | 0.0%                 |
| BUCCAP       | 5                      | 1                          | 20.0%               | 3                       | 0                           | 0.0%                 |
| SWIMAC       | 3                      | 0                          | 0.0%                | 3                       | 0                           | 0.0%                 |
| QUATUR       | 0                      | 0                          |                     | 3                       | 0                           | 0.0%                 |
| ORMKRU       | 7                      | 5                          | 71.4%               | 2                       | 0                           | 0.0%                 |
| DRYGLA       | 3                      | 2                          | 66.7%               | 2                       | 0                           | 0.0%                 |



|         |    |    |        |   |   |       |
|---------|----|----|--------|---|---|-------|
| HIRRUG  | 2  | 0  | 0.0%   | 2 | 1 | 50.0% |
| TETBAL  | 2  | 2  | 100.0% | 2 | 0 | 0.0%  |
| EUGSTA  | 0  | 0  |        | 2 | 0 | 0.0%  |
| PSYBRA  | 0  | 0  |        | 2 | 0 | 0.0%  |
| DENARB  | 3  | 0  | 0.0%   | 1 | 0 | 0.0%  |
| ILEOBC  | 2  | 0  | 0.0%   | 1 | 0 | 0.0%  |
| BYRSPI  | 1  | 0  | 0.0%   | 1 | 0 | 0.0%  |
| HOMRAC  | 1  | 0  | 0.0%   | 1 | 0 | 0.0%  |
| CLIHIR  | 0  | 0  |        | 1 | 0 | 0.0%  |
| CORSUL  | 0  | 0  |        | 1 | 0 | 0.0%  |
| UREBAC  | 12 | 12 | 100.0% | 0 | 0 |       |
| UNKNOWN | 8  | 8  | 100.0% | 0 | 0 |       |
| PALCRO  | 7  | 7  | 100.0% | 0 | 0 |       |
| HENSQU  | 6  | 3  | 50.0%  | 0 | 0 |       |
| OCOSPA  | 5  | 0  | 0.0%   | 0 | 0 |       |
| MICRAC  | 4  | 4  | 100.0% | 0 | 0 |       |
| TABHET  | 3  | 2  | 66.7%  | 0 | 0 |       |
| KHANYA  | 2  | 2  | 100.0% | 0 | 0 |       |
| CASGUI  | 1  | 1  | 100.0% | 0 | 0 |       |
| LAPPOR  | 1  | 1  | 100.0% | 0 | 0 |       |
| MAGSPL  | 1  | 1  | 100.0% | 0 | 0 |       |
| TRIPAL  | 1  | 0  | 0.0%   | 0 | 0 |       |

**Table S3.** Damage information of each species from hurricane María. The list is in the descending order of the abundance of each species before hurricane María.

| Species Code | # of stems Dead | # of stems with Damage III | # of stems with Damage II | # of stems with Damage I | # of stems Intact | Total # of stems |
|--------------|-----------------|----------------------------|---------------------------|--------------------------|-------------------|------------------|
| PREMON       | 23              | 10                         | 3                         | 99                       | 49                | 184              |
| SLOBER       | 7               | 23                         | 23                        | 49                       | 57                | 159              |
| DACEXC       | 3               | 2                          | 12                        | 60                       | 25                | 102              |
| CYAPOR       | 3               | 3                          | 0                         | 0                        | 51                | 57               |
| CECSCH       | 28              | 10                         | 6                         | 7                        | 3                 | 54               |
| CASARB       | 6               | 3                          | 1                         | 15                       | 6                 | 31               |
| INGLAU       | 1               | 6                          | 2                         | 14                       | 6                 | 29               |
| OCOLEU       | 3               | 6                          | 4                         | 9                        | 6                 | 28               |
| SAPLAU       | 1               | 9                          | 8                         | 4                        | 1                 | 23               |
| SCHMOR       | 1               | 4                          | 3                         | 4                        | 6                 | 18               |
| CORBOR       | 0               | 2                          | 2                         | 1                        | 12                | 17               |
| GUAGUI       | 0               | 1                          | 7                         | 6                        | 1                 | 15               |
| HENFAS       | 3               | 3                          | 7                         | 2                        | 0                 | 15               |
| MICTET       | 4               | 1                          | 2                         | 4                        | 2                 | 13               |
| PSYBER       | 2               | 2                          | 5                         | 2                        | 2                 | 13               |
| MANBID       | 0               | 0                          | 0                         | 5                        | 5                 | 10               |
| ALCFLO       | 0               | 4                          | 2                         | 2                        | 0                 | 8                |
| ALCLAT       | 0               | 4                          | 1                         | 1                        | 1                 | 7                |
| LAEPRO       | 0               | 2                          | 3                         | 0                        | 2                 | 7                |
| MYRDEF       | 0               | 2                          | 0                         | 3                        | 2                 | 7                |
| ANIBRA       | 1               | 2                          | 0                         | 2                        | 1                 | 6                |
| CYAARB       | 2               | 1                          | 0                         | 0                        | 3                 | 6                |
| STEOBT       | 0               | 0                          | 1                         | 3                        | 2                 | 6                |
| ANDINE       | 0               | 0                          | 1                         | 4                        | 0                 | 5                |
| GUAGLA       | 0               | 1                          | 0                         | 0                        | 4                 | 5                |
| EUGEGE       | 0               | 0                          | 1                         | 0                        | 3                 | 4                |
| INGVER       | 1               | 0                          | 2                         | 1                        | 0                 | 4                |
| MELHER       | 0               | 0                          | 3                         | 0                        | 1                 | 4                |
| MICPRA       | 0               | 2                          | 0                         | 2                        | 0                 | 4                |
| MYRSPL       | 0               | 0                          | 1                         | 1                        | 2                 | 4                |
| SYZJAM       | 0               | 1                          | 1                         | 2                        | 0                 | 4                |
| BUCCAP       | 0               | 0                          | 1                         | 2                        | 0                 | 3                |
| QUATUR       | 0               | 0                          | 2                         | 1                        | 0                 | 3                |
| SWIMAC       | 0               | 2                          | 1                         | 0                        | 0                 | 3                |
| DRYGLA       | 0               | 0                          | 0                         | 1                        | 1                 | 2                |
| EUGSTA       | 0               | 0                          | 0                         | 0                        | 2                 | 2                |
| HIRRUG       | 1               | 0                          | 0                         | 1                        | 0                 | 2                |
| ORMKRU       | 0               | 2                          | 0                         | 0                        | 0                 | 2                |

|        |   |   |   |   |   |   |
|--------|---|---|---|---|---|---|
| PSYBRA | 0 | 0 | 0 | 2 | 0 | 2 |
| TETBAL | 0 | 0 | 0 | 0 | 2 | 2 |
| BYRSPI | 0 | 0 | 0 | 0 | 1 | 1 |
| CLHIR  | 0 | 0 | 0 | 0 | 1 | 1 |
| CORSUL | 0 | 1 | 0 | 0 | 0 | 1 |
| DENARB | 0 | 0 | 0 | 1 | 0 | 1 |
| HOMRAC | 0 | 0 | 0 | 1 | 0 | 1 |
| ILEOBC | 0 | 0 | 0 | 1 | 0 | 1 |

**Table S4.** Damage information of each DBH class from hurricane María.

| DBH class    | # of stems Dead | # of stems with Damage III | # of stems with Damage II | # of stems with Damage I | # of stems Intact | Total # of stems |
|--------------|-----------------|----------------------------|---------------------------|--------------------------|-------------------|------------------|
| 2.5 – 5 cm   | 1               | 14                         | 23                        | 38                       | 91                | 167              |
| 5 – 10 cm    | 14              | 28                         | 23                        | 68                       | 95                | 228              |
| 10 – 20 cm   | 35              | 30                         | 22                        | 146                      | 63                | 296              |
| ≥ 20 cm      | 20              | 30                         | 30                        | 60                       | 11                | 151              |
| Not measured | 20              | 7                          | 7                         | 0                        | 0                 | 34               |

**Table S5.** Damage information of each crown dominance category from hurricane María.

| Crown dominance | # of stems Dead | # of stems with Damage III | # of stems with Damage II | # of stems with Damage I | # of stems Intact | Total # of stems |
|-----------------|-----------------|----------------------------|---------------------------|--------------------------|-------------------|------------------|
| Dominant        | 0               | 1                          | 6                         | 23                       | 6                 | 36               |
| Co-Dominant     | 0               | 3                          | 14                        | 88                       | 27                | 132              |
| Intermediate    | 4               | 12                         | 27                        | 107                      | 87                | 237              |
| Suppressed      | 5               | 78                         | 50                        | 94                       | 128               | 355              |
| Not measured    | 81              | 15                         | 8                         | 0                        | 12                | 116              |
